# Supplementary material for: Dynamic Resilience Quantification of Hydropower Infrastructure in Multihazard Environments
Source: Atypon-hosted journal article supplement (doi:10.1061/jitse4.iseng-2188), 2023-03-09
Supplement: supplemental_materials_jitse4.iseng-2188_badr.pdf [file supplemental_materials_jitse4.iseng-2188_badr.pdf]

## SUPPLEMENTAL MATERIALS

*ASCE Journal of Infrastructure Systems*

# Dynamic Resilience Quantification of Hydropower Infrastructure in Multihazard Environments

Ahmed Badr, Zoe Li, and Wael El-Dakhakhni

**DOI:** 10.1061/JITSE4.ISENG-2188

© ASCE 2023

[www.ascelibrary.org](http://www.ascelibrary.org)

# PAPER SUPPLEMENTARY MATERIALS

## CHEAKAMUS RESILIENCE-CENTRIC SD MODEL COMPONENTS RELATIONSHIPS

This section presents the details of the six integrated modules for the Cheakamus resilience-centric SD model including, the definition of each module component and the mathematical equations that define the relations between the system components.

### Hydraulic Module

The hydraulic module, shown in **Figure S1**, represents the hydraulic system components that affect the hydraulic status of the hydropower dam during the operational period. These components are summarised, as shown in **Table S1**.

**Table S1.** Dynamic variables used in the hydraulic module equations

| <b>Dynamic Variables</b> | <b>Symbol</b>                |
|--------------------------|------------------------------|
| Reservoir storage        | <i>RS</i> ( $m^3/s$ )        |
| Inflow                   | <i>IF</i> ( $m^3/s$ )        |
| Outflow                  | <i>OF</i> ( $m^3/s$ )        |
| Reservoir Level          | <i>RL</i> ( <i>m</i> )       |
| Spillway Gate Release    | <i>SGR</i> ( $m^3/s$ )       |
| Breach flow              | <i>BF</i> ( $m^3/s$ )        |
| Penstock leakage         | <i>PL</i> ( $m^3/s$ )        |
| Power flow release       | <i>PF</i> ( $m^3/s$ )        |
| Overtopping flow         | <i>OT</i> ( $m^3/s$ )        |
| Unobstructed gate flow   | <i>UGF</i> ( $m^3/s$ )       |
| Intake gate              | <i>IG</i> ( <i>binary</i> )  |
| Gate capacity            | <i>GC</i> (%)                |
| Dam breach trigger       | <i>DBT</i> ( <i>binary</i> ) |
| Dam breach trigger level | <i>DBTL</i> ( <i>m</i> )     |

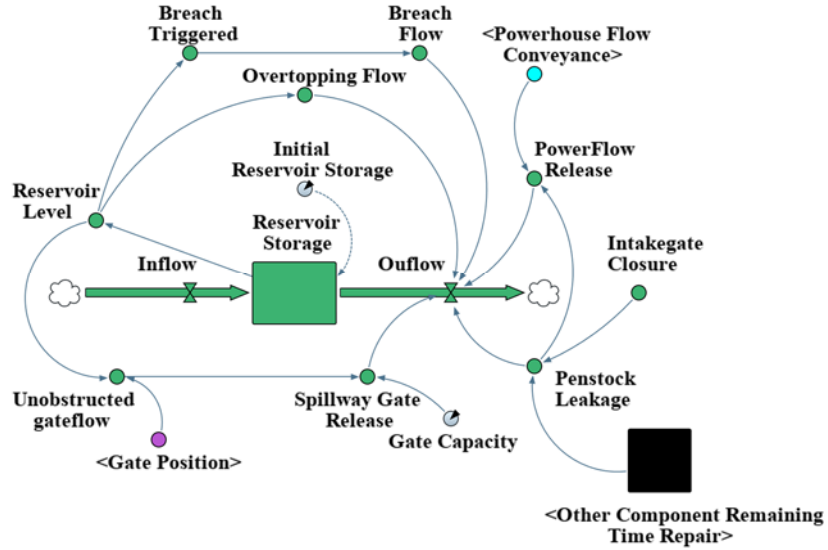

Fig. S1 Hydraulic Module components

15  
16

17 This module represents reservoir storage "RS" as a stock, where the input is the inflow "IF"  
18 and the output is the outflow "OF", as shown in Eq. S1. RS can also be determined using the stage  
19 storage curve as function in reservoir water level "RL", as shown in Eq. S2.

20 
$$\frac{d(RS)}{dt}$$

21 
$$= IF - OF \quad \text{Eq. S1}$$

22 
$$RL = \text{Stage Storage curve (RS)} \quad \text{Eq. S2}$$

23 IF is considered as input data to the SD model. It should be noted that in this study, historical  
24 inflow data is used in the validation and resilience quantification process. On the other hand, OF  
25 is determined as the summation of five outflow components, including Spillway Gate Release  
26 "SGR", breach flow "BF", Penstock leakage "PL", Power flow release "PF", Overtopping flow  
27 "OT", as shown in Eq. S3.

28 
$$OF = SGR + BF + PL + PF$$
  
29 
$$+ OF \quad \text{Eq. S3}$$

30 SGR represents the Unobstructed gate flow "UGF", considering the real-time Gate capacity  
31 "GC", as shown in Eq. S4. UGF is the gate flow in the case of no debris (i.e., GC= 100%), which

32 can be determined using the gates rating curves as a function in reservoir water level "*RL*" and the  
 33 gate position "*GP*" (determined by the gate actuator module), as shown in **Eq. S5**.

$$34 \quad SGR = UGF \times GC \quad \text{Eq. S4}$$

$$40 \quad UGF = \text{Gates rating curve } (RL, GP) \quad \text{Eq. S5}$$

35 *BF* is defined by the full reservoir storage when a dam breach is triggered "*DBT*" (when the  
 36 dam is breached, the reservoir is completely emptied). Dam breach is usually triggered when the  
 37 reservoir water level exceeds a particular level "*DBTL*" above the earth dam crest. In this study,  
 38 *DBTL* is assumed to be 381.73m, according to King, 2020. *DBT* is a binary value of 1 for breached  
 39 and zero for not breached, as shown in **Eq. S6** and **S7**.

$$41 \quad \text{if } (RL > DBTL): DBT = 1; \text{ else: } DBT = 0 \quad \text{Eq. S6}$$

$$42 \quad \text{if } (DBT = 1): BF = RS; \text{ else: } BF = 0 \quad \text{Eq. S7}$$

43 *PL* is defined as the leakage flow occurred if the penstock is failed (i.e., Penstock rupture).  
 44 Penstock rupture is initiated by the hazard sector (according to hazard impacts), where *PL* is equal  
 45 to the Headcover max flow "*HCMF*" when the penstock rupture remaining repair time "*PsRrt*" is  
 46 larger than zero. As shown in **Eq. S8**, *PL* also depends on the status of the Intake gate "*IG*", where  
 47 zero means the gate is open, and one means the gate is closed. The intake gate is usually placed at  
 48 the upper stream end of the power flow conduit, where it is closed to reduce the negative impact  
 49 of the excessive flows resulting from the penstock rupture (i.e., *PsRrt* > 0) or head cover failure  
 50 (i.e., *HcRrt* > 0). The closure of the intake gate also depends on *RL*, where *RL* must reach an  
 51 elevation below the sill of the *IG* (363.06 m) to be closed, as shown in **Eq. S9**.

$$52 \quad \text{if } (PsRrt > 0 \ \&\& \ IG = 0): PL = HCMF; \text{ else: } PL \\ 53 \quad = 0 \quad \text{Eq. S8}$$

54  $if (PsRt > 0 \text{ or } HcRrt > 0): (if (RL < 363.06): IG = 1; \text{ else: } IG = 0); \text{ else: } IG$   
 55  $= 0$  Eq.S9

56  $PF$  is defined by the flow transferred to the powerhouse (powerhouse flow conveyance  
 57 " $PHFC$ "), as determined by the turbine actuator sector, considering reduction that may occur due  
 58 to the escaping flow of penstock leakage  $PL$  (if the penstock fails).  $IG$  status also affects the  $PF$ ,  
 59 where  $IG$  might be closed to empty the powerhouse for penstock or headcover maintenance, as  
 60 shown in **Eq. S10**.

61  $if (IG = 0): PF = PFC - PL; \text{ else: } PF = 0$  Eq.S10

62  $OF$  is determined using the overflow stage-discharge curve, stated in BC. Hydro, 2005, as a  
 63 function in  $RL$  to determine the total overflow discharge passing over the reservoir's free-overflow  
 64 weirs or/and saddle dams or/and main earth dam.

65  $OT = \text{Overflow stage discharge curve } (RL)$  Eq.S11

66 **Sensor Module**

67 The sensor module, shown in **Fig. S2**, represents the collection and transmission process of  
 68 the hydraulic variables from the hydraulic module to the operation module. These components  
 69 are summarised, as shown in **Table S2**.

70 **Table S2.** Sensor module dynamic variables

| <b>Dynamic Variables</b> | <b>Symbol</b>     |
|--------------------------|-------------------|
| Sensor condition         | $SC$ (binary)     |
| Gauge reading            | $GR$ (m)          |
| Gauge reading errors     | $GRE$ (%)         |
| Gauge Processing         | $GP$ (binary)     |
| Gauge relay              | $Grl$ (m)         |
| PLCRTU                   | $PLCRTU$ (binary) |

71

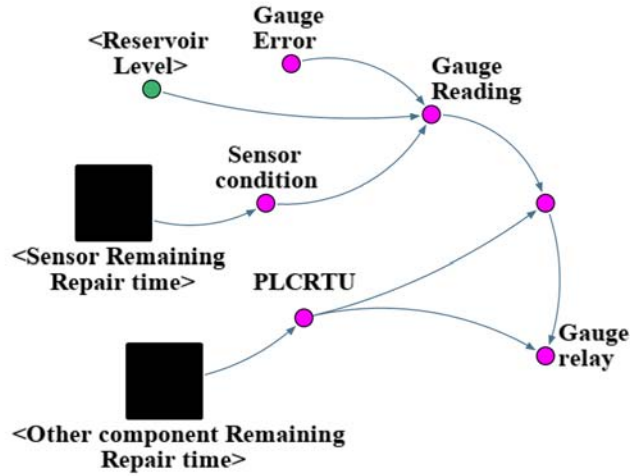

Fig. S2 Sensor Module components

72  
73

74 As long as the sensors are properly functioning, gauge reading "GR" records RL considering  
75 the gauge reading errors "GRE", as shown in Eq. S12 and S13.

$$76 \quad \text{if } (SRrt > 0): SC = 0; \text{ else } SC = 1 \quad \text{Eq. S12}$$

$$78 \quad \text{if } (SC = 1): GR = RL + \left(\frac{GRE}{100}\right) \times RL; \text{ else: } GR = -1000 \quad \text{Eq. S13}$$

79 The gauge processing "GP" node represents the interpretation of the collected data processed  
80 by PLC. If the PLC is working properly, the collected data is sent to the operation sector through  
81 the gauge relay "GRI". The gauge relay is carried out by a remote terminal unit RTU. In this model,  
82 the communication tools, including RTU and PLC, are modeled as one variable, "PLCRTU", where  
83 the multi-hazard module determines the repair time for this component according to the hazard  
84 impact. The following Eq. S14 and S15 describe the previous system components process.

$$85 \quad \text{if } (PLCRTURrt > 0): PLCRTU = 0; \text{ else } PLCRTU = 1 \quad \text{Eq. S14}$$

$$86 \quad \text{if } (PLCRTU = 0): GP = -1000, GRI = -1000; \text{ else: } GP = GR, GRI = GR$$

87  $\quad \quad \quad = GR \quad \quad \quad \text{Eq. S15}$

88

89 **OPERATION MODULE**

90 The operation module, shown in **Fig. S3**, is responsible for determining the turbine and gate  
91 instructions, considering the current and expected dam hydraulic status and the operational targets.

92 The operation module components are summarised in **Table S3**.

93

94

95

96

97

98

99

100

101

102

**Table S3.** Operation module dynamic variables

| <b>Dynamic Variables</b>                         | <b>Symbol</b>                                           |
|--------------------------------------------------|---------------------------------------------------------|
| Turbine instruction                              | <b><i>TI (m<sup>3</sup>/s)</i></b>                      |
| Gate instruction                                 | <b><i>GI (m)</i></b>                                    |
| Forecasted inflow for the next 14 days           | <b><i>IF<sub>forecasted</sub> (m<sup>3</sup>/s)</i></b> |
| Max. & Min. Reservoir level for the next 14 days | <b><i>RL<sub>Limits</sub> (m)</i></b>                   |
| Fish flow for the next 14 days                   | <b><i>FF (m<sup>3</sup>/s)</i></b>                      |
| Manual actuation                                 | <b><i>MA (binary)</i></b>                               |
| Manual actuation initiated                       | <b><i>MAI (days)</i></b>                                |
| Initiate                                         | <b><i>Int (days)</i></b>                                |
| Site staff mobilized                             | <b><i>SSM (binary)</i></b>                              |
| Demobilized                                      | <b><i>DM(days)</i></b>                                  |
| Site staff notified                              | <b><i>SSN (binary)</i></b>                              |
| Contacting initiation                            | <b><i>CI (days)</i></b>                                 |
| Contacting delays                                | <b><i>CD (days)</i></b>                                 |
| Contacting remaining time                        | <b><i>Crt (days)</i></b>                                |
| Contacting                                       | <b><i>CO (days)</i></b>                                 |
| Accessing site remaining time                    | <b><i>ASrt (days)</i></b>                               |
| Mobilizing Initiation                            | <b><i>MI (days)</i></b>                                 |
| Mobilizing                                       | <b><i>MO (days)</i></b>                                 |
| Accessing delays                                 | <b><i>AD (days)</i></b>                                 |

103

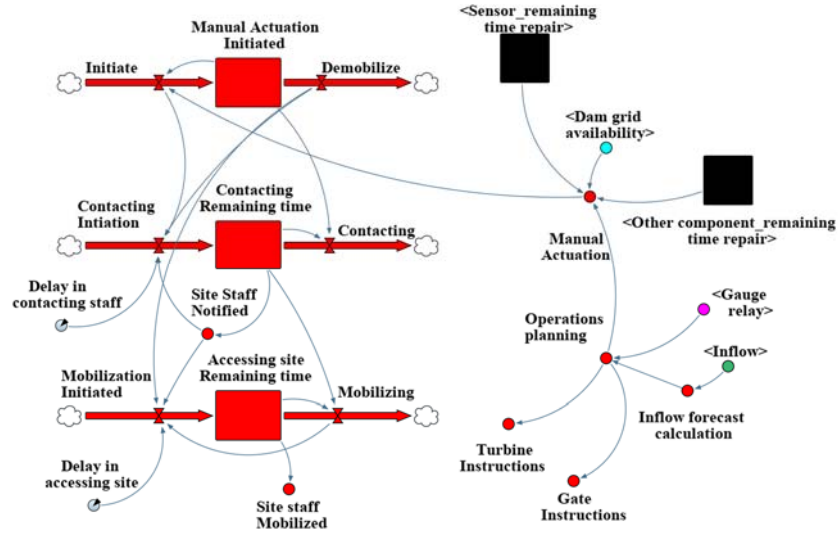

104

105

Fig. S3 Operation Module components

106 The gate “GI” and turbine “TI” instructions are determined by the Operations planning  
 107 algorithm, which aims to maximize power releases and ensure the minimum gate releases (i.e., fish  
 108 flow). The operations planning algorithm, adopted from King et al., 2020, initially sets the gate  
 109 releases equal to the fish flow, while the remaining inflow discharge is directed to the turbines with  
 110 a maximum power flow is 65 m<sup>3</sup>/s. Using the inflow forecasts “*IF<sub>forecasted</sub>*”, reservoir level limits  
 111 (i.e., MNRL, MaNRL, MRL, MaRL), and fish flow demand for the next 14-day, the algorithm  
 112 adjusts the initial gates and turbine releases over the 14-day window to maintain the *RL* within the  
 113 normal operating range (detailed operation planning algorithm can be found in King, 2020). In this  
 114 study, the model utilizes the historical Daisy Lake inflow data for the forecasted reservoir inflow.  
 115 However, this forecasted inflow can be more realistically alternatively predicted using the climate  
 116 forecasts and watershed models to determine the effect of climate change.

117 In the absence of hazards, gates usually operate remotely. However, hazards may impact  
 118 the communication tools *PLCRTU* or sensors. Subsequently, manual actuation “*MA*” should be  
 119 initiated until the *PLCRTU* or the sensors are returned to service, as shown in Eq. S16.

120  $if (SRrt > 0 Or PLCRTURrt > 0): MA = 1; else: MA = 0$  Eq.S16



121 The manual actuation initiation process is represented by a stock "MAI" with an inflow is  
 122 initiate "Int", and the outflow is demobilization "DM". DM is set to zero when the site staff is  
 123 mobilized, and manual actuation is no longer required, as shown in **Eq. S17 and S18**.

$$124 \text{ if } (MA = 1 \text{ and } MAI = 0): Int = 1; \text{ else: } Int = 0 \quad \text{Eq. S17}$$

$$125 \text{ if } (SSM = 1 \text{ and } MA = 0): DM = 1; \text{ else: } DM$$

$$126 = 0 \quad \text{Eq. S18}$$

127 The mobilization process for the site staff starts by notifying the plant manager to contact the site  
 128 staff to be mobilized. As such, the contacting process is represented by stock to represent the  
 129 remaining time to notify the plant manager and contact site staff "Crt", where its inflow is the  
 130 contact initiation "CI" and its outflow is contacting "CO". The contacting process is represented to  
 131 simulate any delay in the contact process "CD". Once the Crt stock is drained (i.e., Crt = 0), the  
 132 site staff "SSN" is considered to be notified and despatched to the site, as shown in **Eq. S19, S20,**  
 133 **S21**.

$$134 \text{ if } (Int = 1 \text{ and } SSM = 0 \text{ and } SSN = 0): CI = CD; \text{ else : } CI = 0 \quad \text{Eq. S19}$$

$$135 \text{ if } (Crt > 0 \text{ and } MAI = 1): CO = 1; \text{ else: } CO = 0 \quad \text{Eq. S20}$$

$$136 \text{ if } (MA = 1 \text{ and } Crt = 0): SSN = 1; \text{ else: } SSN$$

$$137 = 0 \quad \text{Eq. S21}$$

138 As the site staff is being notified, the model mimics the process of accessing the site. The  
 139 accessing process is represented as a stock of accessing site remaining time "ASrt" with an inflow  
 140 of mobilization initiation "MOBI" and outflow of mobilizing "MOB". The accessing process is  
 141 represented to consider any access delays for the site staff "AD". Once the ASrt stock is drained,  
 142 the site staff is considered to be mobilized, as shown in **Eq. S22, S23, and S24**.

$$143 \text{ if } (ASrt > 0 \text{ and } SSM = 0 \text{ and } SSN = 1): MOBI = AD; \text{ else : } MOBI = 0 \quad \text{Eq. S22}$$

144  $if (ASrt > 0 \text{ and } SSM = 0): MOB = 1; \text{ else: } MOB = 0$

Eq.S23

145  $if (ASrt = 0 \text{ and } MAI = 1): SSM = 1; \text{ else: } SSM = 0$

Eq.S24

146

147 **ACTUATOR MODULE**

148 **GATE ACTUATOR MODULE**

149 The gate actuator module, shown in **Fig. S4**, represents spillway gate components, which  
 150 interact to adjust the spillway gate position according to the gate instructions. The gate actuator  
 151 module components are summarised in **Table S4**.

152

**Table S4.** Gate actuator module dynamic variables

| Dynamic Variables    | Symbol                |
|----------------------|-----------------------|
| Gate failed in place | <i>Fip (binary)</i>   |
| Gate collapse        | <i>Fcoll (binary)</i> |
| Gate closed          | <i>Fc (binary)</i>    |
| Gate availability    | <i>GA (binary)</i>    |
| Gate power supply    | <i>GPS (binary)</i>   |
| Gate Position        | <i>GP (m)</i>         |
| Maximum opening      | <i>MP (m)</i>         |
| Last gate position   | <i>LGP (m)</i>        |

153

154

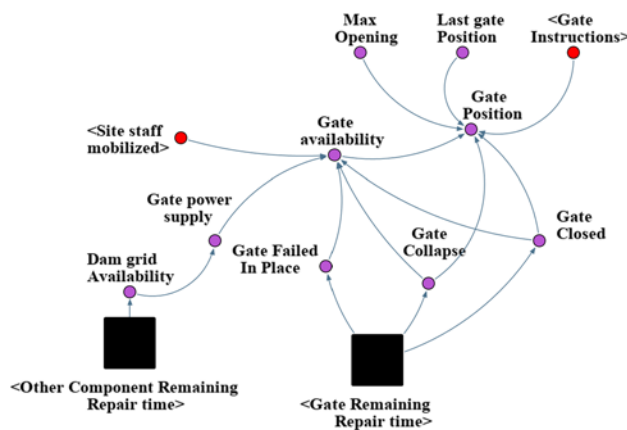

155

156

**Fig. S4** Gate Actuator Module components

157 This module represents two main nodes, Gate availability "GA" and Gate position "GP". GA  
 158 is determined based on the gate components affected by hazard impact. Generally, Gate

159 components failures lead to three types of gate failure (binary): 1) Gate remains in the closed  
 160 position "*Fc*"; 2) Gate sticks in its current position "*Fip*"; 3) Gate collapses "*Fcoll*". According to  
 161 the hazard impact, these three types of failures are initiated, and the required repair time by the  
 162 multi-hazard module. *GA* is also affected by the gate power supply "*GPS*" status, depending on  
 163 dam grid availability. Moreover, in the case of manual actuation, Site staff should be mobilized to  
 164 consider the gate is available, as shown in **Eq. S25 and S26**.

$$165 \text{ If } (MA = 0): \text{ if } (Fc = 0 \ \&Fcoll = 0 \ \&Fip = 0 \ \&GPS = 1): GA = 1; \text{ else: } GA = 0 \quad \text{Eq. S25}$$

$$166 \text{ If } (MA = 1): \text{ if } (Fc = 0 \ \&Fcoll = 0 \ \&Fip = 0 \ \&SSM = 1): GA = 1; \text{ else: } GA$$

$$167 \quad \quad \quad = 0 \quad \text{Eq. S26}$$

168 If the gate is available, *GP* is set to gate instructions "*GI*" determined by the operational  
 169 module. On the other hand, *GP* should set to the maximum opening position "*MP*" (12.5m for the  
 170 Cheakamus dam) if the gate collapses, while *GP* is equal to zero if the gate fails in closed position.  
 171 In case the gate is exposed to remain in place failure, *GP* should be equal to the last gate position  
 172 "*LGP*" recorded, as shown in **Eq. S27**.

$$173 \text{ If } (Fcoll = 1): GP = MP; \text{ If } (Fc = 1): GP = 0; \text{ If } (Fip = 1): GP = LGP;$$

$$174 \text{ If } (GA = 1): GP = GI \quad \quad \quad \text{Eq. S27}$$

## 175 **POWER ACTUATOR MODULE**

176 The power actuator module, shown in **Fig. S5**, represents the turbine components, which  
 177 interact to determine the power releases according to the turbine instructions. The power actuator  
 178 module components are summarised in **Table S5**.

179 **Table S5.** Power actuator module dynamic variables

| Dynamic Variables       | Symbol              |
|-------------------------|---------------------|
| Power unit availability | $PUA$ (binary)      |
| Turbine flow            | $TF$ ( $m^3/s$ )    |
| Head cover              | $HC$ (binary)       |
| Generator               | $GN$ (binary)       |
| Maximum head cover flow | $MHCF$ ( $m^3/s$ )  |
| Maximum Turbine flow    | $Tfmax$ ( $m^3/s$ ) |
| Sill discharge          | $Qsill$ ( $m^3/s$ ) |
| Power flow conveyance   | $PFC$ ( $m^3/s$ )   |

180

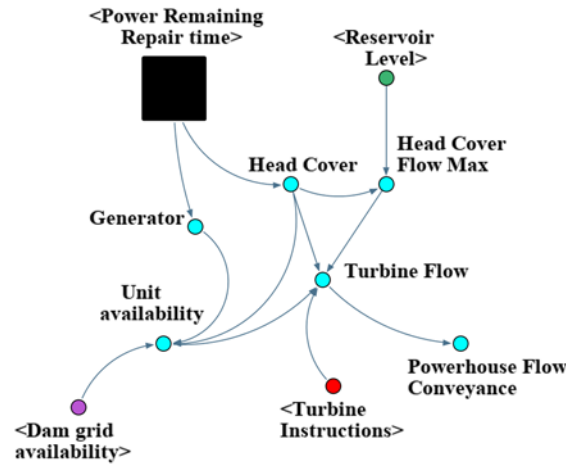

181

182

Fig. S5 Turbine Actuator Module component

183

184

185

186

187

188

189

190

191

This module is highly complex in real life; however, it has been simplified without affecting the model results accuracy to avoid model complexity and the large computational time. As such, the two main components being considered in this module are Power unit availability " $PUA$ " and Turbine flow " $TF$ ". The power unit is considered available if the turbine components are working properly, including Headcover " $HC$ " and Generator " $GN$ ". According to the hazard impact,  $HC$  and  $GN$  are considered unavailable for the Power components remaining repair time, determined by the multi-hazard module.  $PUA$  should also consider dam grid availability " $DGA$ " if it is affected by hazard impact. (See, Eq. S28)

$$If (HC = 1; GN = 1): PUA = 1; else PUA = 0$$

Eq. S28

192 If the power unit is available, the unit can release the turbine flow equal to the turbine  
 193 instructions. However, no turbine flow is released if the *GN* is unavailable. Also, if the *HC* fails,  
 194 the maximum headcover flow "*MHCF*" is released, as shown in **Eq. S29**.

195  $If (PUA = 1): TF = TI; If (PUA = 0 \& GN = 0): TF = 0;$

196  $If (PUA = 0 \& HC = 0): TF$

197  $= MHCF$

*Eq. S29*

198 *MHCF* is a site-specific relationship to be determined by the system modeler. In this model,  
 199 *MHCF* is assumed to be five times the maximum turbine flow for the current reservoir level  
 200 "*TFmax*" considering that the intake gate should be opened, as shown in **Eq. S30**. However, if this  
 201 value ( $5 * TFmax$ ) makes the *RL* drop below the sill level (363.06 m), *MHCF* is adjusted to "*Qsill*"  
 202 to reduce the flow passing into the power tunnel from the reservoir. Moreover, If the gate collapses,  
 203 no flow is released to the power unit, as shown in **Eq. S30 and S31**.

204  $If (IG = 0): MHCF = \min(5 * TFmax(RL), Qsill); else: MHCF = 0$  *Eq. S30*

205  $Qsill = \max(RS + IF - SGR - RS_{at\ RL=363.06}, 0)$  *Eq. S31*

206 As turbine flow is determined, power flow conveyance "*PFC*" equals the sum of the  
 207 releases passes through each turbine unit (only one unit is considered in this model), as shown in  
 208 **Eq. S32**.

209  $PFC = \sum TF$  *Eq. S32*

210

211

212

213 **MULTI-HAZARD MODULE**

214 The multi-hazard module, shown in Fig. S6, represents the hazard type, impact time, and the  
 215 corresponding failed system components. The power actuator module components are summarised  
 216 in Table S6.

217 **Table S6.** Multi-hazard module dynamic variables

| Dynamic Variables                              | Symbol                  |
|------------------------------------------------|-------------------------|
| Hazard impact time                             | <i>IT (days)</i>        |
| Hazard type                                    | <i>HT (code)</i>        |
| Componenet outage time length                  | <i>COTL (days)</i>      |
| Gate remaining repair time (array)             | <i>GRrt (days)</i>      |
| Failed close remaining repair time             | <i>FcRrt (days)</i>     |
| Failed remain in place remaining repair time   | <i>FipRrt (days)</i>    |
| Failed collapse remaining repair time          | <i>FcollRrt (days)</i>  |
| Power remaining repair time (array)            | <i>PRrt (days)</i>      |
| Headcover remaining repair time                | <i>HCRrt (days)</i>     |
| Generator remaining repair time                | <i>GNRrt (days)</i>     |
| Other componenet remaining repair time (array) | <i>OCRrt (days)</i>     |
| PLCRTU remaining repair time                   | <i>PLCRTURrt (days)</i> |
| Penstock remaining repair time                 | <i>PNRrt (days)</i>     |
| Grid remaining repair time                     | <i>GDRrt (days)</i>     |
| Sensor remaining repair time                   | <i>SRrt (days)</i>      |

218

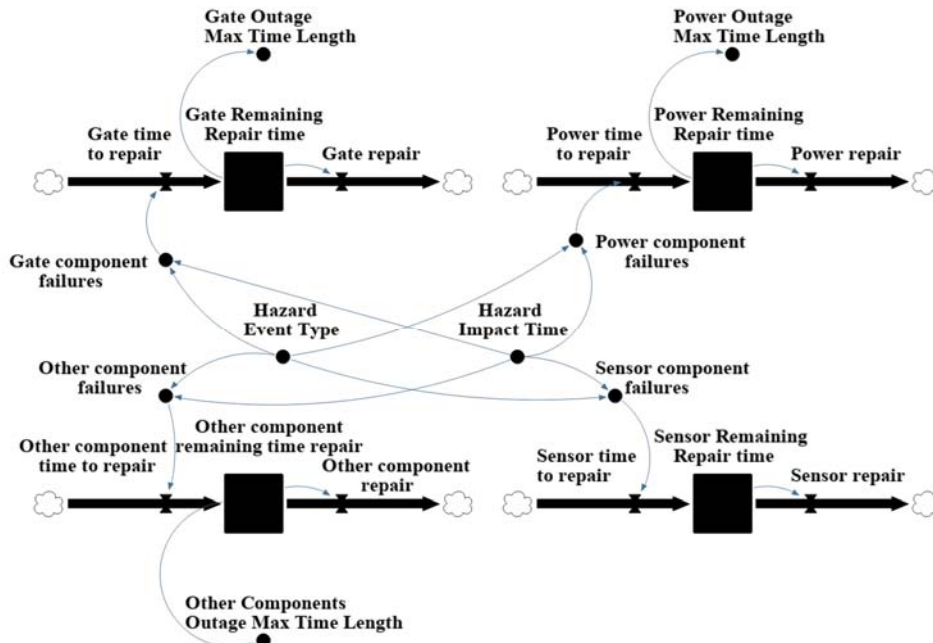

219

220

**Fig. S6** Multi-hazard Module components

221 Hydropower system components that can be affected by the hazards have been divided into four  
222 groups: 1) Power components failure, including failure of head cover and generator; 2) Gate  
223 components failure, including components failure, leads to gate closure, gate collapse, and the gate  
224 remains in place; 3) Sensor's components failure including no-reading failure for the sensors; 4)  
225 Other components failure including communication equipment (i.e., *PLCRTU*), penstock rupture,  
226 and dam grid failure. Each group is simulated by a stock representing the components' remaining  
227 repair time, with an inflow defined by the time to repair, and outflow defined by the repair time.  
228 The stock and the two flows are defined as a dynamic array to represent its components (e.g., Power  
229 Components Remaining repair time "*PCRrt*" is an array with two elements, *PCRrt [0]* represent  
230 headcover component remaining repair time and *PCRrt [1]* represent generator component  
231 remaining repair time). The time to repair inflow rate is initiated at the hazard impact time "*IT*" and  
232 defined by the component outage time length "*COTL*" which represents the time length for the  
233 failed component to be out of service until it recovers according to the hazard event type "*HT*".  
234 *COTL*, *IT*, and the sequence of the *HT* impacting the system are defined based on the generated  
235 multi-hazard scenario (see next section). *Outage Max Time Length* nodes represent the maximum  
236 remaining repair time of all components represented by the stock (e.g., Power Outage Max time  
237 Length is 20 days if the headcover is out of service for 10 days and the generator is out of service  
238 for 20 days). These nodes track the gate and turbine availability regardless of the failed component.  
239 It should also be noted that each type is simulated as an array that consists of different elements.  
240 Gate stock and flows are dynamic array which composed of three elements Failed close, Failed in  
241 place, and Collapsed, while Power stock and flows composed of two elements Head cover and  
242 Generator. Other component stock and flows consists of three elements *PLCRTU*, Penstock and  
243 Grid. The following equations **Eq. S33 and S34** are general for the four types of components

244 affected by the hazards, where  $X$  refers to G (for Gate), P (for Power), S (for Sensor), and OC (for  
 245 Other component).

$$246 \frac{d(XRrt)}{dt} = X \text{ time to repair} - X \text{ repair} \quad \text{Eq.S33}$$

$$247 \text{ If } (t = IT \ \&HT = N): X\text{componentfailure} = COTL_N; \text{ else: } X\text{componentfailures} = 0 \quad \text{Eq.S34}$$

248  $X\text{Outage Max Time length} = \text{Max}(XRrt [i])$ , where  $i$  is the elements of each  $XRrt$  array

### 249 **DYNAMIC RESILIENCE MODULE**

250 The dynamic resilience module, shown in **Fig. S7**, represents the dynamic variables used  
 251 to determine the change in system performance and subsequently calculate system resilience based  
 252 on the developed resilience quantification approach. The dynamic resilience module components  
 253 are summarised in **Table S7**.

254 **Table S7.** Dynamic resilience module dynamic variables

| <b>Dynamic Variables</b>                        | <b>Symbol</b>              |
|-------------------------------------------------|----------------------------|
| System performance                              | $P_{(Y)}(t)$               |
| Initial system performance                      | $P_0_{(Y)}(t)$             |
| System performance state                        | $SPS_{(Y)}(\text{binary})$ |
| Deduct                                          | $Dt_{(Y)}(\text{binary})$  |
| System performance losses                       | $\rho_{(Y)}(t)$            |
| System performance losses at the previous step  | $\rho_{(Y)}(t - 1)$        |
| Current hazard impact time                      | $CIT(t) \text{ (days)}$    |
| Current hazard impact time at the previous step | $CIT(t-1) \text{ (days)}$  |

255



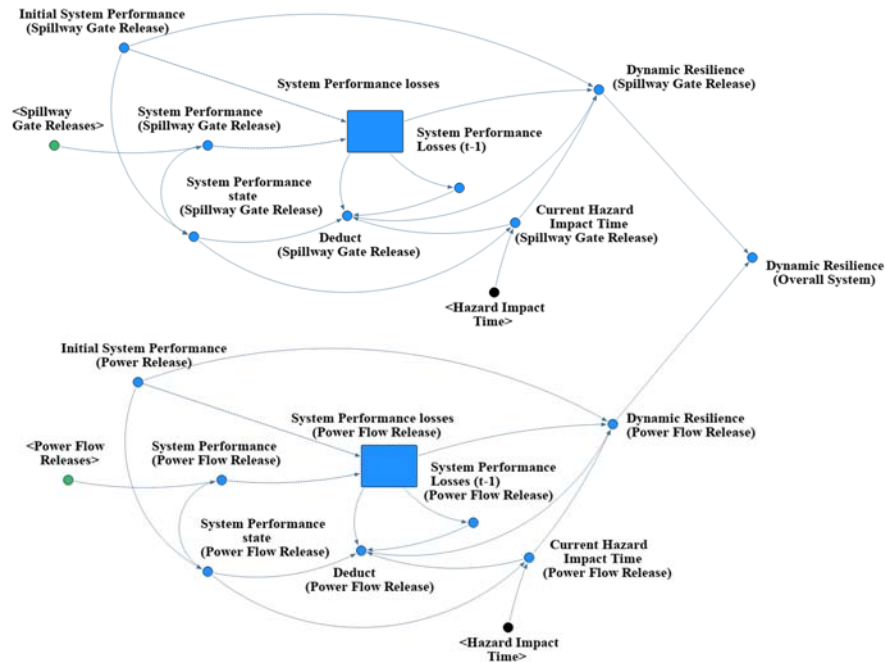

Fig. S7 Dynamic Resilience Module components

256  
 257  
 258 Within this demonstration example, the module quantifies overall system dynamic  
 259 resilience corresponding to the spillway gates releases that may refer to the loss of system  
 260 functionality to ensure irrigation or fish flow demands and power flow releases that may refer to  
 261 the losses in system functionality to ensure hydropower generation demands. For the two  
 262 components (Power flow releases and Spillway gate releases), System performance  $(P(t))$  is  
 263 calculated based on Eq. S1 (in the original manuscript) as the ratio between the actual and the  
 264 designed releases. In this demonstration example, the designed releases are assumed to be the  
 265 spillway gates and power releases in normal operations without any hazards. It should be noted  
 266 that in the real-life of dams, system performance metrics are not usually a simple function in the  
 267 flow values; however, it may refer to the hydropower or irrigation demands (depends on dam multi-  
 268 purposes) with upper and lower allowable limits, which may also vary with time along the year.  
 269 However, due to the unavailability of the detailed system objectives/demands, this demonstration  
 270 example considers the designed system outputs equal to the output in the normal operations (in  
 271 case of no hazards). The change in system performance stock subsequently accumulates the system

272 performance losses ( $\rho(t)$ ) starting from the current hazard impact time ( $t_0$ ). Current hazard impact  
273 time "*CIT*" is updated by the hazard impact times "*IT*" for each hazard event, considering that the  
274 hazard event changes the system performance state "*SPS*". As explained previously, for  
275 consecutive hazard events, where the secondary hazard occurred after the system is recovered from  
276 the primary hazard impact, System performance losses  $\rho_t$  should be calculated for each hazard  
277 separately. As such, Deduct node "*Dt*" is responsible for subtracting the system performance losses  
278 at the previous step " $\rho_{(t-1)}$ " from the accumulated system performance stock value for the dynamic  
279 resilience calculation at the start of the secondary hazard impact time. Subsequently, the Dynamic  
280 Resilience node can estimate the system resilience at each time step for each component based on  
281 **Eqs. S4-S9** in the original manuscript. Then, the System Dynamic Resilience node computes the  
282 overall system dynamic resilience by integrating the two dynamic resilience nodes for each  
283 component based on **Eq. S10** in the original manuscript.

284 The following equations **Eq. S35, S36, and S37** are applicable for both spillway gates and power  
285 flow releases resilience quantification, where  $Y$  is general symbol that refers to Spillway releases  
286 and Power flow releases. It should also be noted that  $P(t)$ ,  $\rho(t)$  and  $r(t)$  regarding Spillway and  
287 Power flow releases and the overall system resilience  $R(t)$  are calculated using **Eq. S4-S9** stated in  
288 the original manuscript.

$$289 \text{ If } (|P_{0(Y)}(t) - P_{(Y)}(t)| > 0): SPS_{(Y)} = 1; \text{ else } SPS_{(Y)} = 0 \quad \text{Eq. S35}$$

$$290 \text{ If } (SPS_{(Y)} = 1): CIT_{(Y)}(t) = IT(t); \text{ else } CIT_{(Y)}(t) = IT(t - 1) \quad \text{Eq. S36}$$

$$291 \text{ If } (CIT_{(Y)}(t) \neq CIT_{(Y)}(t - 1) \&\& SPS_{(Y)} = 1): Dt_{(Y)} = \rho_{(Y)}(t - 1); \text{ else: } Dt_{(Y)} = 0 \quad \text{Eq. S37}$$

292

293

294

295 **CHEAKAMUS SD MODEL VALIDATION**

296 The Cheakamus dam SD model is validated with the actual dam and the SD model  
297 constructed by King, 2020 outputs under different normal operations using the historical inflow  
298 data from 1967-1998 adopted from BC. Hydro, 2002. As shown in **Fig. S8 and S9**, the median  
299 curve of the power flow release and the total outflow of the SD model show a good agreement with  
300 the median of the numerical output of King, 2020 and the median of the actual values of the  
301 Cheakamus hydropower dam.

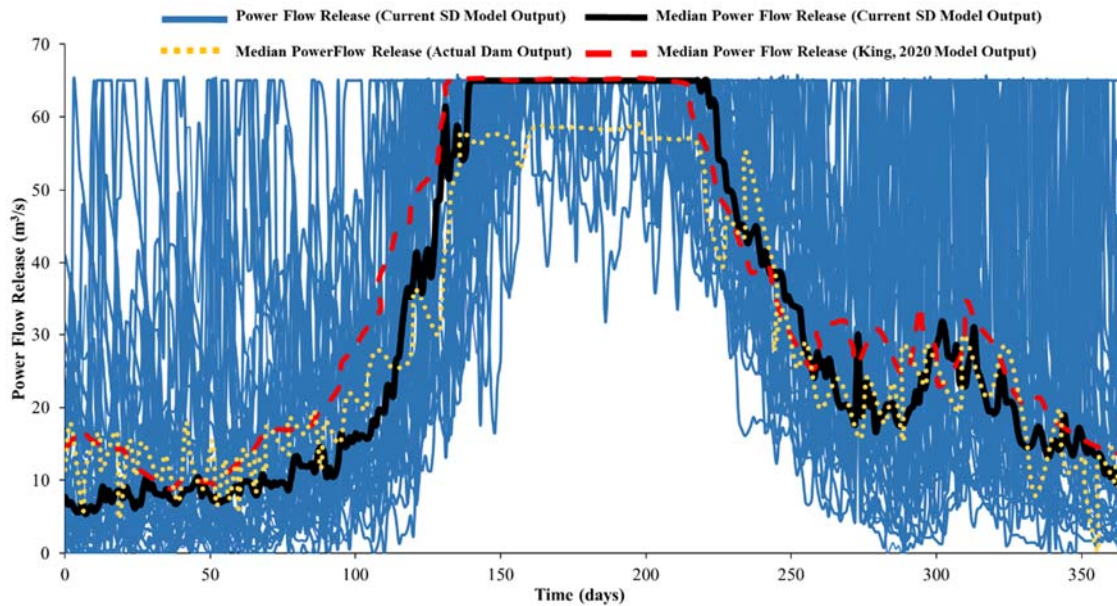

302

303

304

**Fig. S8 Power Flow Release Validation**

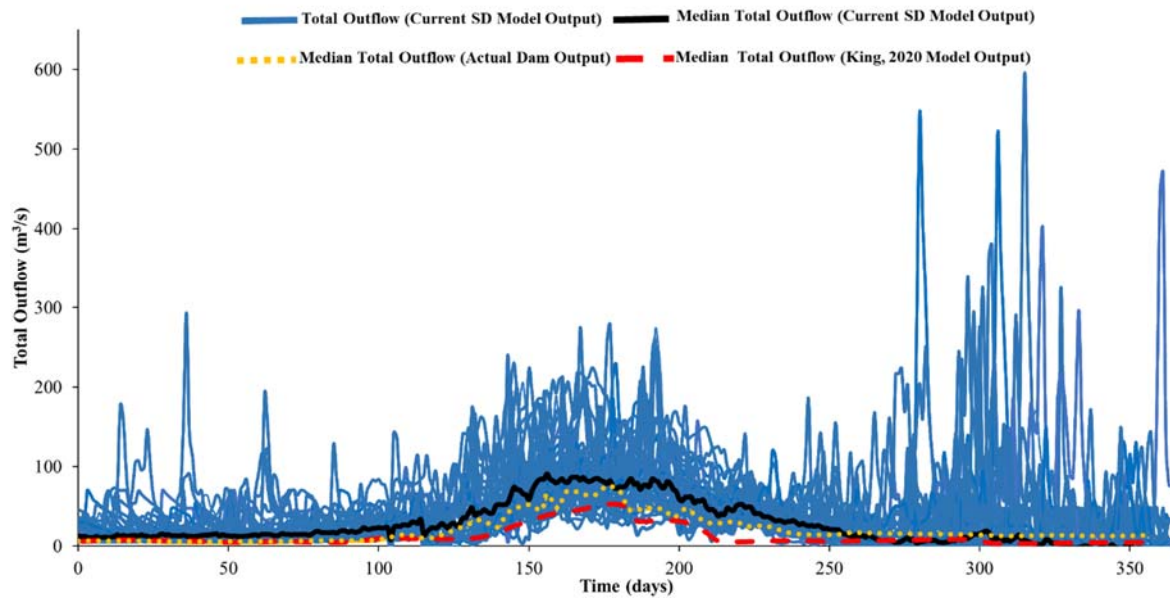

305  
306

**Fig. S9 Total Outflow Validation**

307 **REFERENCES**

- 308 1. BC. Hydro. 2002. Cheakamus River water use plan, report of the consultative committee.  
309 Vancouver, BC, Canada: B.C. Hydro.
- 310 2. BC. Hydro. 2005. Cheakamus project water use plan. Vancouver, BC, Canada: B.C. Hydro.
- 311 3. King, L. M., 2020. Using a systems approach to analyze the operational safety of dams.  
312 Electronic Thesis and Dissertation Repository. 6880. <https://ir.lib.uwo.ca/etd/6880>
